# Supplementary material
Source: PubMed Central journal article supplement (PMC8043652)
Supplement: mmc1.pdf [file mmc1.pdf]

**Supplemental information**

**CD8<sup>+</sup> T cells specific for an immunodominant  
SARS-CoV-2 nucleocapsid epitope cross-react  
with selective seasonal coronaviruses**

**Katie E. Lineburg, Emma J. Grant, Srividhya Swaminathan, Demetra S.M. Chatzileontiadou, Christopher Szeto, Hannah Sloane, Archana Panikkar, Jyothy Raju, Pauline Crooks, Sweera Rehan, Andrea T. Nguyen, Lea Lekieffre, Michelle A. Neller, Zhen Wei Marcus Tong, Dhilshan Jayasinghe, Keng Yih Chew, Christian A. Lobos, Hanim Halim, Jacqueline M. Burrows, Alan Riboldi-Tunncliffe, Weisan Chen, Lloyd D'Orsogna, Rajiv Khanna, Kirsty R. Short, Corey Smith, and Stephanie Gras**

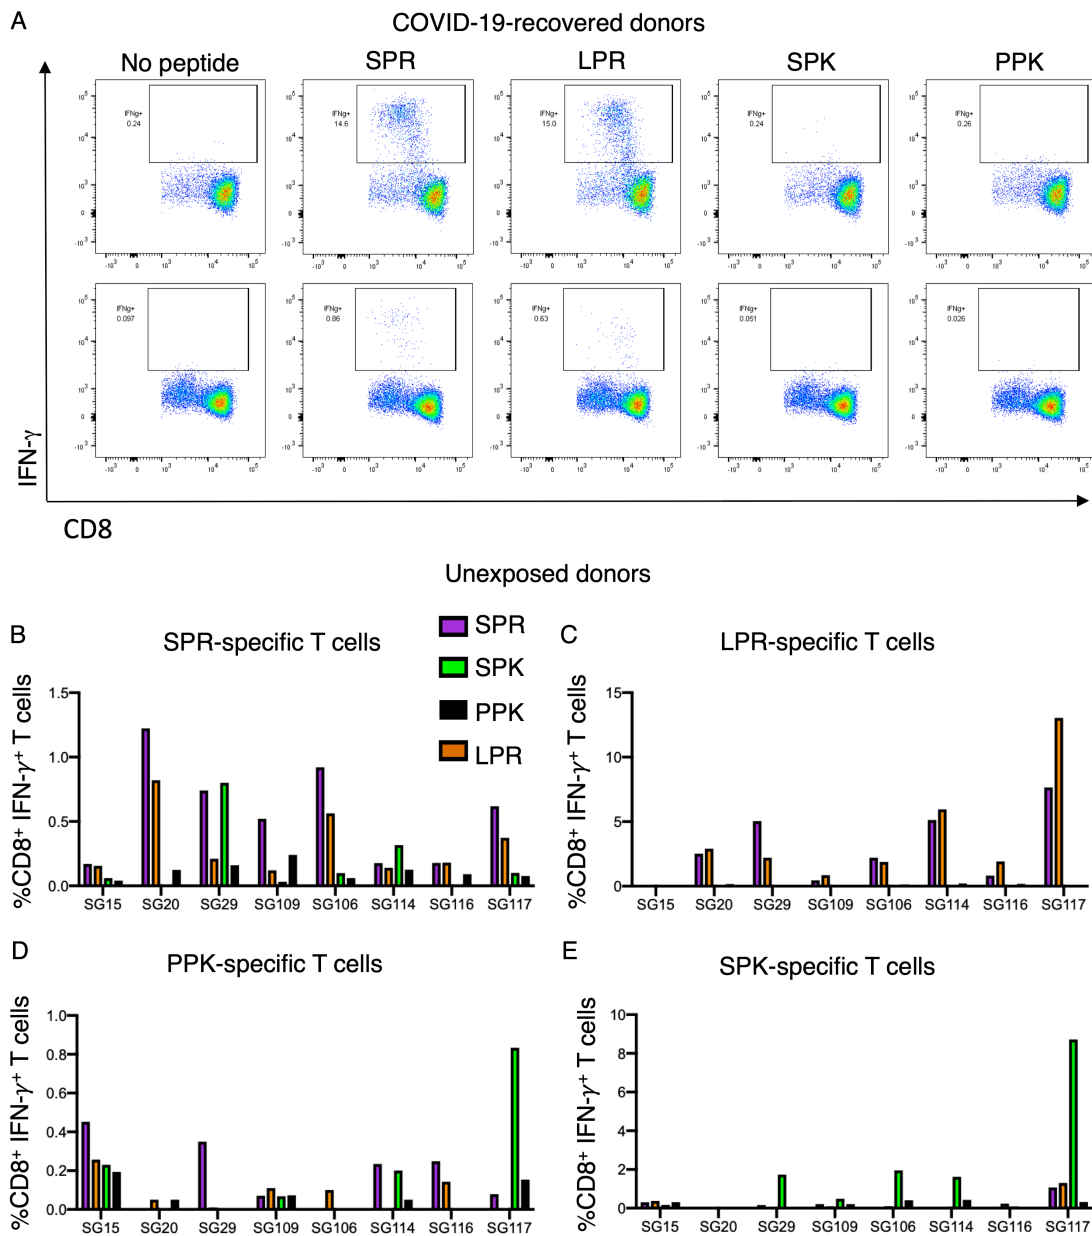

**Figure S1. Cross-reactivity of SPR-specific CD8<sup>+</sup> T cells in COVID-19-recovered donors and from unexposed donors towards coronavirus peptides, Related to Figure 3.**

(A) Following 14 days in culture, SPR-specific T cells were re-stimulated with five separate peptide conditions: no peptide control, cognate SPR, LPR, SPK or PPK and IFN- $\gamma$  production was measured using an ICS assay. Representative flow cytometry displaying IFN- $\gamma$  production in CD8<sup>+</sup> T cells generated from two separate COVID-19-recovered donors (top and bottom panels). (B-E) Peptide-specific CD8<sup>+</sup> T cells were expanded from unexposed donors (n=8) by stimulation with the (B) SPR, (C) LPR, (D) SPK or (E) PPK peptides and then re-stimulated separately with each peptide. The frequency of CD8<sup>+</sup> IFN- $\gamma$  producing T cells was determined using an ICS assay. Summary of CD8<sup>+</sup> IFN- $\gamma$  responses towards each of the variant peptides with the no peptide control subtracted.

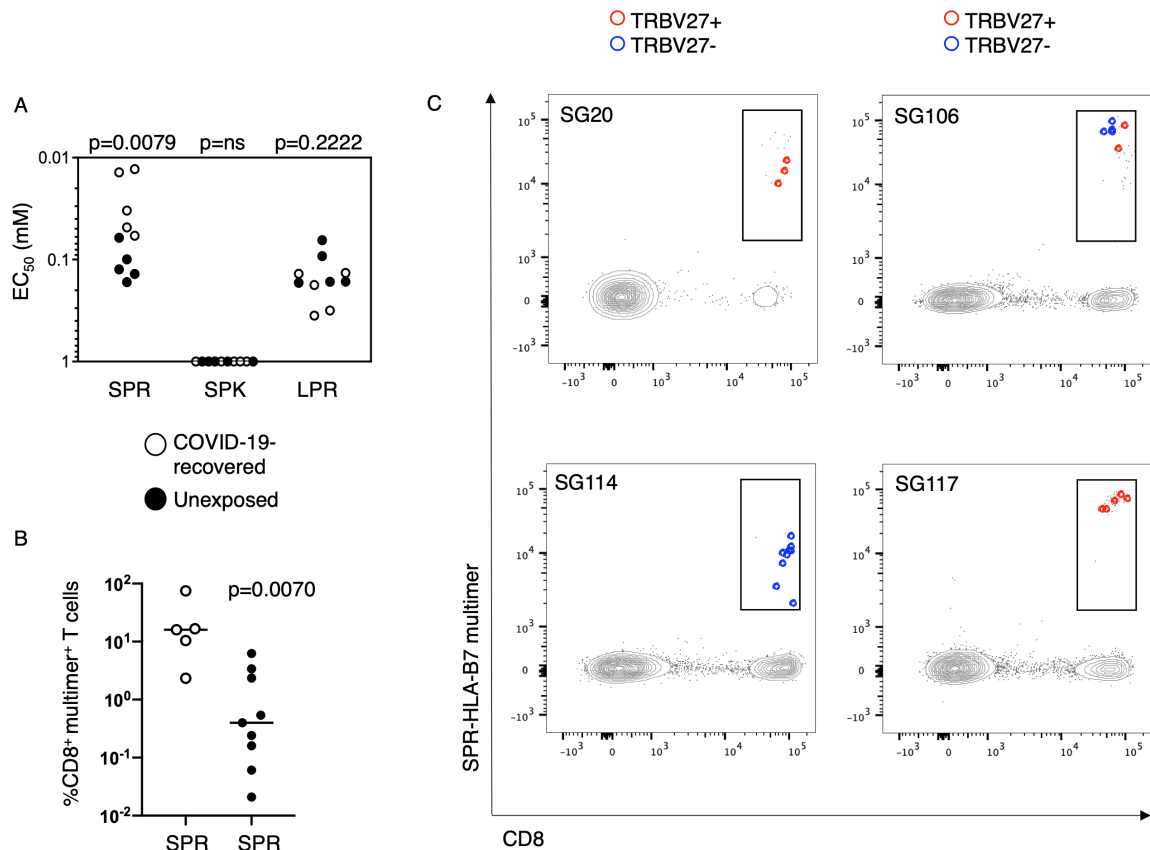

**Figure S2. Functional avidity and magnitude of epitope-specific CD8<sup>+</sup> T cells from COVID-19-recovered and unexposed donors, and index sorting of SPR-specific T cells from unexposed donors, Related to Figure 3.**

(A-B) Peptide-specific CD8<sup>+</sup> T cells were expanded from PBMCs derived from unexposed and COVID-19-recovered individuals. (A) Graph comparing the avidity (EC<sub>50</sub>) of SPR-specific T cells derived from both COVID-19-recovered (white) and unexposed (black) individuals in response to cognate SPR peptide and homologous SPK and LPR peptides measured by IFN- $\gamma$  production in an ICS assay. (B) Graph comparing the frequency of CD8<sup>+</sup> multimer<sup>+</sup> T cells between COVID-19 recovered (white) and unexposed (black) donors. The groups were compared using the Mann-Whitney test with  $p < 0.05$  for significance, ns: non-significant. (C) SPR-specific CD8<sup>+</sup> T cells from unexposed donors were stained with SPR-HLA-B7 multimer and multimer<sup>+</sup>CD8<sup>+</sup> cells were single-cell index sorted. A few clonotypes utilising TRBV27<sup>+</sup> (red) or TRBV27<sup>-</sup> (blue) overlaid on the total CD3<sup>+</sup>/CD8<sup>+</sup> population are represented to show the wide range of functional avidities of the clones independently of the TRBV27 gene expression.

A

SPR-specific T cells (SARS-CoV-2)

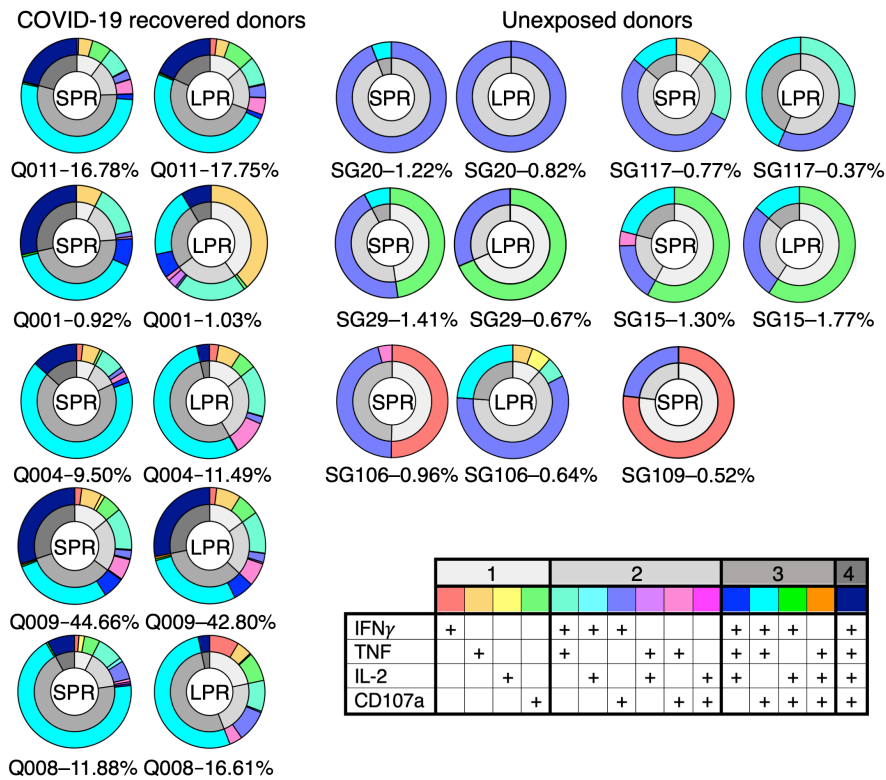

B LPR-specific T cells (OC43/HKU-1)

C SPK-specific T cells (229E)

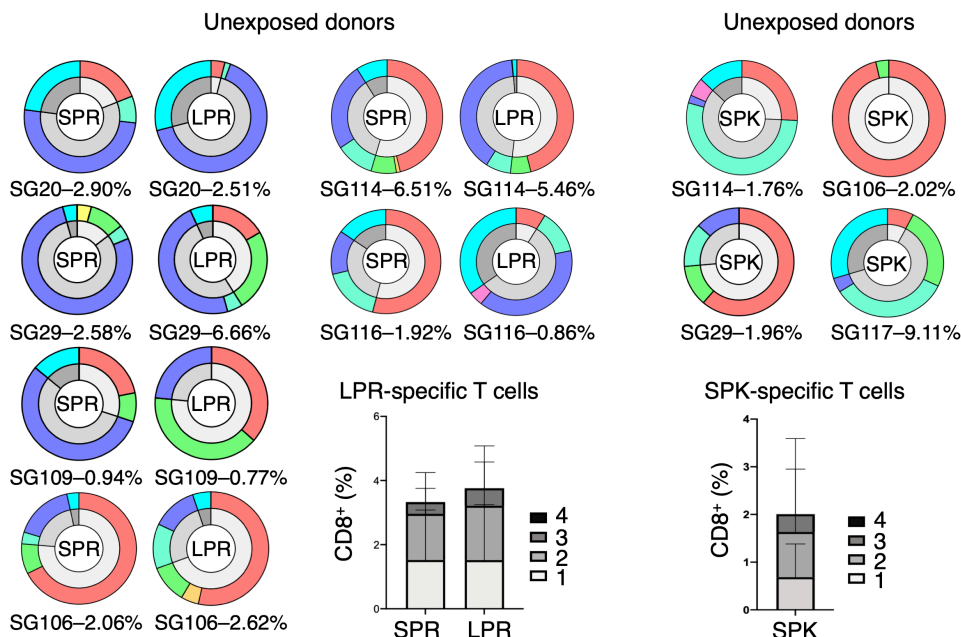

**Figure S3. Polyfunctionality of SPR-specific CD8<sup>+</sup> T cells from COVID-19-recovered and unexposed donors and LPR- and SPK-specific T cells from unexposed donors, Related to Figure 3.**

(A) SPR-specific T cell lines were established from COVID-19-recovered (n=5) and unexposed donors (n=6), and re-stimulated individually with the SPR and LPR peptides in an ICS assay. (B) LPR- and (C) SPK-specific T cells were established and re-stimulated individually with the SPR, LPR, and SPK peptides in an ICS assay. The frequency of CD8<sup>+</sup> T cells with different cytokine production profiles (IFN- $\gamma$ , TNF,

IL-2 and CD107a) was determined, along with the number of different cytokines produced, minus the no peptide control. The outer ring of the double ring pie shows the cytokine profile in different colours, and the inner ring represents the number of cytokines produced with black for 4 and white for one.

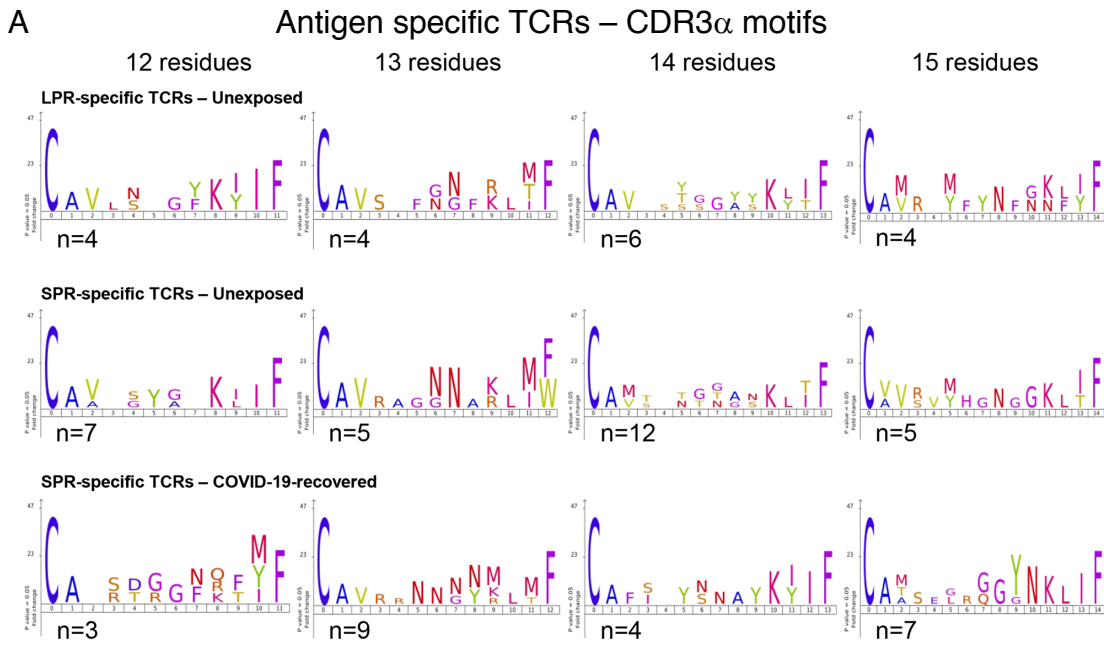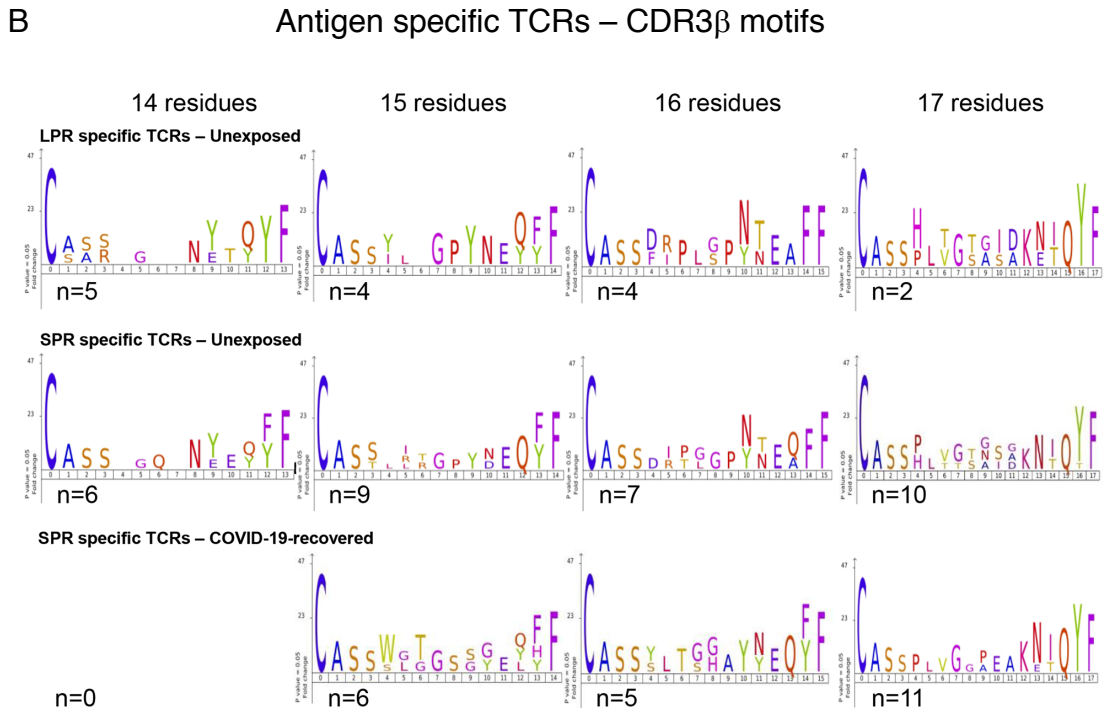

**Figure S4. CDR3 $\alpha$  and CDR3 $\beta$  analysis of the LPR- and SPR-specific CD8<sup>+</sup> T cells, Related to Figure 4.**

PBMCs from COVID-19-recovered or unexposed individuals were stimulated with the SPK or LPR peptides and cultured for 10-14 days in the presence of IL2. CD8<sup>+</sup> T cell lines were stained with SPK or LPR multimer and multimer<sup>+</sup> cells were single-cell sorted and the TCR repertoire was determined by multiplex PCR. Analysis of the motifs of CDR3 $\alpha$  and CDR3 $\beta$  sequences from distinct SPR and LPR-specific CD8<sup>+</sup> T cell clonotypes in unexposed and COVID-19-recovered individuals is shown.

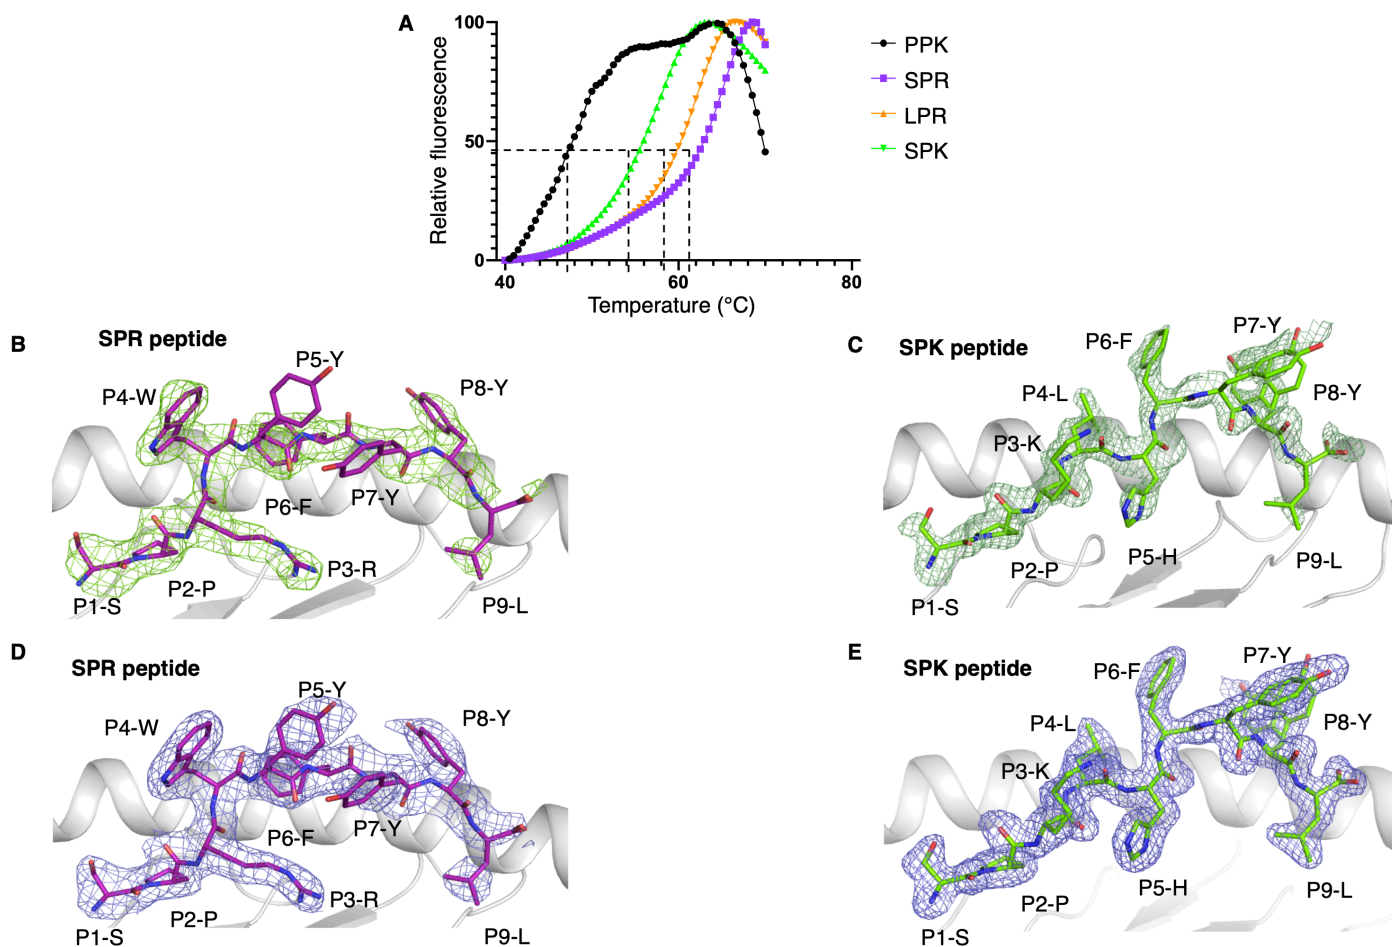

**Figure S5. Thermal stability of HLA-B7 presenting coronavirus peptides and electron density maps of the SPR and SPK peptides presented by HLA-B7, Related to Figure 5.**

(A) Thermal stability profile of HLA-B7 in complex with coronavirus peptides derived from N<sub>105-113</sub> of viral strains SARS-CoV-2 (purple), or its homologous from NL63 (black), 229E (green) and OC43 (orange). Normalised fluorescence intensity follows a sigmoidal curve with an increase in temperature, as SYPRO Orange dye binds to exposed hydrophobic regions of pHLA-B7 during its thermal denaturation. The thermal midpoint temperature is determined at 50% of its normalised fluorescence intensity, allowing for the comparison of stability between pHLA-B7 complexes (summarised in **Table S4**). (B-E) HLA-B7 is represented as a white cartoon, the SPR peptide as purple sticks and the SPK peptide as green sticks. The **B** and **C** panels show the 2mF<sub>o</sub>-F<sub>c</sub> electron density map, before building the peptide, contoured at 3σ and coloured in green, while the **D** and **E** panels show the F<sub>o</sub>-F<sub>c</sub> electron density maps, with the peptides build in and refinement cycles, contoured at 1σ and coloured in blue.

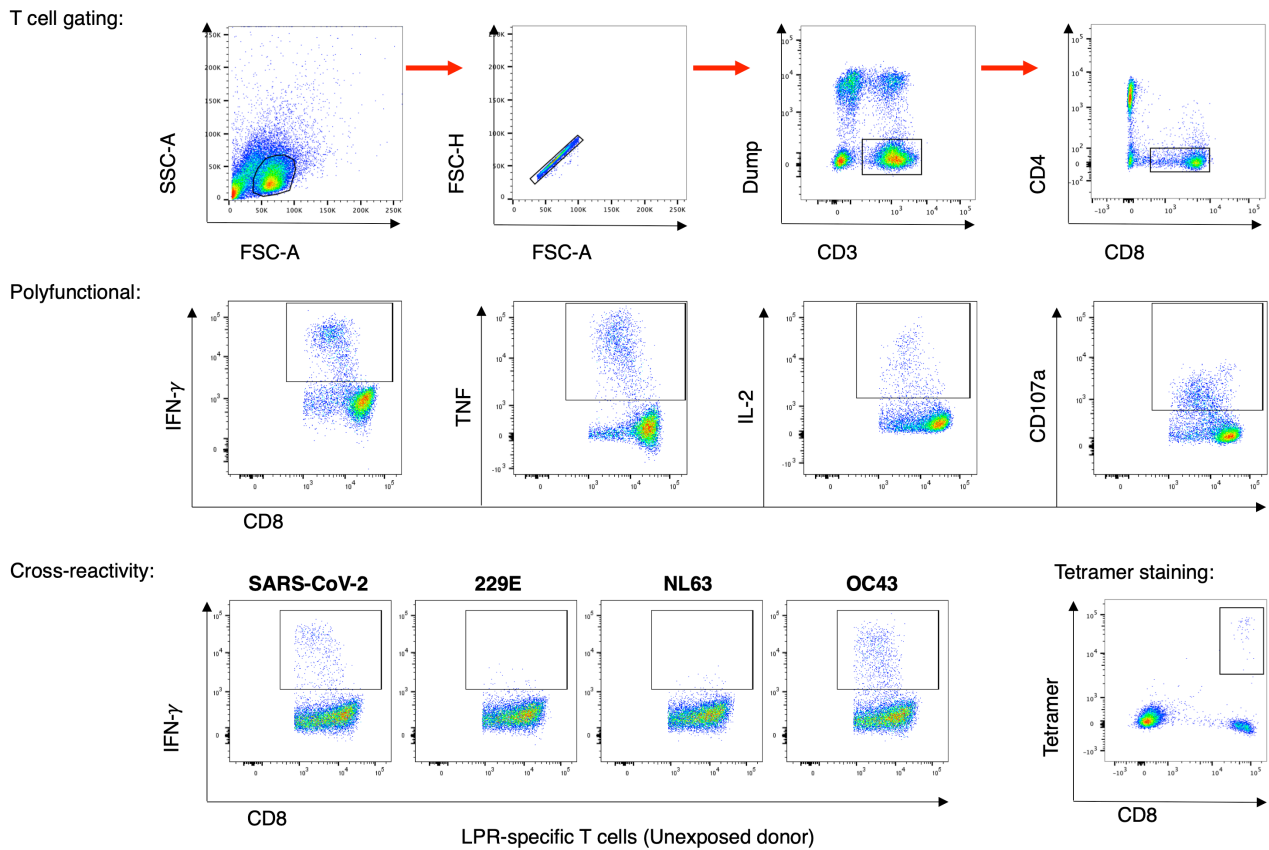

**Figure S6. Gating strategy for our study, Related to Figures 1, 2, 3, and 4.**

Peptide-specific CD8<sup>+</sup> T cells were derived by stimulating PBMCs from unexposed or COVID-19-recovered donors with various peptides as indicated throughout. CD8<sup>+</sup> T cell responses were subsequently assessed by either multimer staining or function in an ICS assay. Representative gating for the identification of CD8<sup>+</sup> T cells in all assays (top panel). Representative gating for the assessment of polyfunctionality (middle panel) or cross-reactivity (bottom panel, left) in an ICS assay. Representative flow cytometry plot of the identification of multimer<sup>+</sup> populations (bottom panel, right).



**Table S1. HLA typing of COVID-19-recovered and unexposed donors, Related to Figures 1, 2, 3, and 4.**

| <b>Donor ID</b> | <b>HLA-A</b>     | <b>HLA-B</b>     | <b>Age</b> | <b>Sex</b> | <b>Day post CoV PCR test</b> |
|-----------------|------------------|------------------|------------|------------|------------------------------|
| SG15            | A*11:01, A*30:01 | B*07:06, B*44:03 | 27         | M          | NA                           |
| SG20            | A*32:01          | B*07:02, B*44:02 | 32         | F          | NA                           |
| SG29            | A*02:01, A*03:01 | B*07:02, B*35:01 | 24         | M          | NA                           |
| SG105           | A*02:01, A*29:02 | B*07:02, B*44:03 | N/A        | N/A        | NA                           |
| SG3             | A*02:01, A*24:02 | B*07:02, B*14:02 | 32         | M          | NA                           |
| SG34            | A*02:01, A*24:02 | B*07:02, B*08:01 | 24         | F          | NA                           |
| SG106           | A*02:01, A*26:01 | B*07:02, B*55:01 | 23         | F          | NA                           |
| SG109           | A*02:01, A*26:01 | B*07:02, B*44:02 | 19         | F          | NA                           |
| SG114           | A*01:01, A*31:01 | B*07:02, B*08:01 | 39         | M          | NA                           |
| SG116           | A*03:01, A*29:02 | B*07:02, B*44:03 | 32         | F          | NA                           |
| SG117           | A*02:01, A*03:01 | B*07:02, B*44:02 | 38         | M          | NA                           |
| GR001           | A*01:01, A*03:01 | B*07:02, B*08:01 | 42         | M          | NA                           |
| GR016           | A*02:1           | B*07:02          | 27         | M          | NA                           |
| GR036           | A*02:01, A*03:01 | B*07:02, B*44:02 | 40         | F          | NA                           |
| GR067           | A*03:01          | B*07:02          | 31         | F          | NA                           |
| GR082           | A*01:01, A*02:01 | B*07:02, B*44:02 | 56         | M          | NA                           |
| GR086           | A*03:01          | B*07:02          | 45         | M          | NA                           |
| Q001            | A*03:01          | B*07:02          | 20         | M          | 58                           |
| Q002            | A*02:01, A*32:01 | B*15:01, B*44:02 | 53         | F          | 49                           |
| Q003            | A*01:01, A*25:01 | B*08:01, B*35:01 | 52         | M          | 53                           |
| Q004            | A*02:01, A*03:01 | B*07:02, B*44:02 | 30         | F          | 51                           |
| Q005            | A*02:01, A*11:01 | B*15:01, B*35:01 | 33         | M          | 58                           |
| Q006            | A*02:01, A*24:02 | B*07:02, B*18:01 | 48         | M          | 48                           |
| Q007            | A*02:01, A*31:01 | B*07:02, B*40:01 | 20         | F          | 53                           |
| Q008            | A*02:01, A*03:01 | B*07:02, B*44:02 | 48         | F          | 58                           |
| Q009            | A*03:01, A*26:01 | B*07:02, B*27:05 | 63         | F          | 62                           |
| Q010            | A*02:01          | B*15:01, B*44:03 | 63         | M          | 49                           |

|      |                  |                  |    |   |     |
|------|------------------|------------------|----|---|-----|
| Q011 | A*02:01          | B*07:02, B*44:02 | 59 | F | 67  |
| Q012 | A*02:01, A*03:01 | B*44:02, B*51:01 | 71 | F | 53  |
| Q013 | A*24:02, A*25:01 | B*08:01          | 51 | F | 54  |
| Q014 | A*03:01, A*29:02 | B*07:02, B*44:03 | 61 | F | 54  |
| Q015 | A*02:01          | B*35:03          | 30 | F | 46  |
| Q016 | A*03:03, A*24:03 | B*35:01, B*38:01 | 25 | F | 71  |
| Q017 | A*03:01, A*26:01 | B*07:02          | 58 | F | 102 |
| Q018 | A*02:05, A*30:01 | B*13:02, B*49:01 | 63 | M | 102 |
| Q019 | A*01:01, A*24:02 | B*08:01, B*27:05 | 60 | F | 59  |
| Q020 | A*24:02, A*31:01 | B*07:02, B*35:02 | 58 | M | 58  |
| Q021 | A*01:01, A*24:02 | B*08:01, B*35:02 | 26 | F | 56  |
| Q022 | A*01:01, A*31:01 | B*07:02, B*08:01 | 21 | F | 57  |
| Q024 | A*01:01, A*03:01 | B*07:02, B*08:01 | 56 | F | 83  |
| Q025 | A*01:01, A*02:01 | B*08:01, B*40:01 | 67 | F | 67  |
| Q026 | A*01:01, A*30:02 | B*40:01, B*49:01 | 39 | F | 61  |
| Q029 | A*02:01, A*31:02 | B*07:02, B*40:01 | 31 | F | 69  |
| Q031 | A*02:01, A*29:02 | B*15:01, B*44:03 | 61 | M | 85  |
| Q032 | A*02:01          | B*27:05, B*44:02 | 25 | F | 70  |
| Q033 | A*02:01, A*24:02 | B*15:01, B*18:04 | 25 | M | 76  |
| Q035 | A*02:01, A*03:01 | B*07:02, B*08:01 | 62 | F | 76  |
| Q038 | A*01:01, A*02:01 | B*08:01, B*44:02 | 41 | F | 88  |
| Q040 | A*02:01, A*32:01 | B*44:02, B*44:03 | 74 | F | 82  |
| Q045 | A*01:01, A*03:01 | B*07:02, B*14:02 | 21 | F | 67  |
| Q046 | A*02:01, A*24:02 | B*15:01, B*40:01 | 44 | M | 80  |
| Q049 | A*01:01, A*03:01 | B*07:02, B*56:01 | 51 | M | 116 |
| Q052 | A*01:01, A*24:02 | B*07:02, B*44:03 | 67 | M | 75  |
| Q062 | A*02:01          | B*08:01, B*18:01 | 22 | F | 124 |

All donors with ID SG or GR are unexposed donors, all donors with ID Q0 are COVID-19-recovered donors, M: male, F: female.

**Table S2. COVID-19 symptoms and classification, Related to Figures 1, 2, 3, and 4.**

| <b>HLA-B7<sup>+</sup> donor ID</b> | <b>Symptom classification</b> | <b>Symptoms included</b> |
|------------------------------------|-------------------------------|--------------------------|
| Q001                               | Other                         | FE CO SO HE LO SK GA     |
| Q004                               | Mild                          | HE LO OT                 |
| Q006                               | Severe                        | CO SH SO HE LO JO GA     |
| Q007                               | NA                            | NA                       |
| Q008                               | Moderate                      | CO SH SO HE SK GA        |
| Q009                               | Mild                          | CO                       |
| Q011                               | Severe                        | SO HE LO OT              |
| Q014                               | Mild                          | FE CO HE LO GA           |
| Q017                               | Mild                          | SO HE OT                 |
| Q020                               | Moderate                      | FE CO SH HE LO JO OT     |
| Q022                               | Mild                          | CO SO LO JO OT           |
| Q029                               | NA                            | NA                       |
| Q035                               | Moderate                      | FE CO SH SO OT           |
| Q045                               | NA                            | NA                       |
| Q049                               | Mild                          | SO HE                    |
| Q052                               | Mild                          | OT                       |
| <b>HLA-B7<sup>-</sup> donor ID</b> | <b>Symptom classification</b> | <b>Symptoms included</b> |
| Q002                               | Mild                          | CO LO OT                 |
| Q003                               | Mild                          | CO HE JO                 |
| Q005                               | Severe                        | CO SH SO HE JO OT        |
| Q010                               | Mild                          | FE CO LO GA              |
| Q012                               | NA                            | NA                       |
| Q013                               | Mild                          | LO OT                    |
| Q015                               | NA                            | NA                       |
| Q016                               | Mild                          | HE OT                    |
| Q018                               | Mild                          | CO SO OT                 |
| Q019                               | Mild                          | SO HE LO JO OT           |
| Q021                               | NA                            | NA                       |
| Q025                               | NA                            | NA                       |

|      |          |                      |
|------|----------|----------------------|
| Q026 | Mild     | FE CO HE LO GA OT    |
| Q031 | Mild     | FE CO                |
| Q032 | Moderate | FE CO SH HE LO GA OT |
| Q033 | NA       | NA                   |
| Q038 | Moderate | FE SH HE LO GA       |
| Q040 | Severe   | FE HE LO JO GA       |
| Q046 | NA       | NA                   |
| Q062 | Mild     | LO OT                |

FE: fever; CO: cough; SO: Sore throat; SH: Short of breath; HE: headache; LO: Loss of taste or smell; JO: Joint pain; GA: Gastrointestinal symptoms; OT: other; SK: Skin rash.

**Table S3. HLA-B7-restricted epitopes defined in SARS-CoV-2 nucleocapsid, Related to Figures 1 and 2.**

| <b>Peptide origin</b> | <b>Peptide name</b> | <b>Peptide sequence</b> | <b>Number of Responders*</b> |
|-----------------------|---------------------|-------------------------|------------------------------|
| N <sub>66-74</sub>    | FPR                 | FPRGQGVPI               | 1 / 17                       |
| N <sub>93-101</sub>   | RIR                 | RIRGGDGKM               | 4 / 17                       |
| N <sub>105-113</sub>  | SPR                 | SPRWYFYYL               | 14 / 17                      |
| N <sub>257-265</sub>  | KPR                 | KPRQKRTAT               | 1 / 17                       |

\*Responders are COVID-19-recovered HLA-B7<sup>+</sup> individuals.

**Table S4. Sequence variation in coronaviruses isolates of the SPR peptide and homologues, Related to Figure 3.**

| Virus      | Sequence                    | Oceania         | Asia            | Europe        | Africa        | North America    | South America | Total number of sequences |
|------------|-----------------------------|-----------------|-----------------|---------------|---------------|------------------|---------------|---------------------------|
| SARS-CoV-2 | SP <u>R</u> WYFY <u>Y</u> L | 100%<br>(8,693) | 100%<br>(1,330) | 100%<br>(438) | 100%<br>(281) | 100%<br>(15,273) | 100%<br>(143) | 26,158                    |
| SARS-CoV-1 | SP <u>R</u> WYFY <u>Y</u> L | NA              | 100%<br>(2)     | NA            | NA            | 100%<br>(11)     | NA            | 13                        |
| OC43       | L <u>P</u> RWYFY <u>Y</u> L | NA              | 100%<br>(61)    | 100%<br>(3)   | 100%<br>(3)   | 100%<br>(69)     | NA            | 136                       |
| HKU-1      | L <u>P</u> RWYFY <u>Y</u> L | NA              | 100%<br>(3)     | 100%<br>(1)   | NA            | 100%<br>(12)     | NA            | 16                        |
| 229E       | S <u>P</u> KLHFY <u>Y</u> L | NA              | NA              | 100%<br>(3)   | NA            | 100%<br>(23)     | NA            | 26                        |
| NL63       | P <u>P</u> KVHFY <u>Y</u> L | NA              | 100%<br>(8)     | NA            | 100%<br>(7)   | 100%<br>(43)     | NA            | 58                        |

Complete full length sequences were obtained from the NCBI virus database <http://www.ncbi.nlm.nih.gov/labs/virus> and were aligned using <https://www.fludb.org/brc/home.spg?decorator=influenza>. The frequency of peptide conservation is shown in green, with the number of sequences aligned from each geographic region shown in parenthesis. Mutations from the SARS-CoV-2 peptide are denoted in blue, and anchor residues are underlined. NA refers to no sequences being available for that geographic region.

**Table S6. Data collection and refinement statistics, Related to Figure 5.**

| <b>Data Collection Statistics</b> | <b>HLA-B7-SPR</b>                               | <b>HLA-B7-SPK</b>                                                                  |
|-----------------------------------|-------------------------------------------------|------------------------------------------------------------------------------------|
| Space group                       | <b>P2<sub>1</sub>2<sub>1</sub>2<sub>1</sub></b> | <b>P1</b>                                                                          |
| Cell Dimensions (a,b,c) (Å)       | 64.45, 107.18, 174.19                           | 57.14, 62.85, 63.01<br>$\alpha=77.15^\circ, \beta=77.00^\circ, \gamma=77.86^\circ$ |
| Resolution (Å)                    | 46.65 – 2.88<br>(3.04 – 2.88)                   | 44.53 – 1.97<br>(2.02 – 1.97)                                                      |
| Total number of observations      | 191654 (26453)                                  | 204851 (14311)                                                                     |
| Nb of unique observation          | 28141 (4027)                                    | 56880 (3904)                                                                       |
| Multiplicity                      | 6.8 (6.6)                                       | 3.6 (3.7)                                                                          |
| Data completeness (%)             | 100 (100)                                       | 98.1 (96.8)                                                                        |
| $I/\sigma_I$                      | 8.0 (1.6)                                       | 5.5 (1.7)                                                                          |
| $R_{pim}^a$ (%)                   | 8.0 (52.9)                                      | 7.4 (43.8)                                                                         |
| $CC_{1/2}$ (%)                    | 89.8 (57.8)                                     | 99.0 (55.2)                                                                        |
| <b>Refinement Statistics</b>      |                                                 |                                                                                    |
| $R_{factor}^b$ (%)                | 20.6                                            | 18.6                                                                               |
| $R_{free}^b$ (%)                  | 26.9                                            | 23.0                                                                               |
| rmsd from ideality                |                                                 |                                                                                    |
| Bond lengths (Å)                  | 0.009                                           | 0.008                                                                              |
| Bond angles (°)                   | 1.038                                           | 0.955                                                                              |
| Ramachandran plot (%)             |                                                 |                                                                                    |
| Favoured                          | 96.3                                            | 97.9                                                                               |
| Allowed                           | 3.6                                             | 1.7                                                                                |
| Disallowed                        | 0.1                                             | 0.4                                                                                |
| <b>PBD code</b>                   | <b>7LGD</b>                                     | <b>7LGT</b>                                                                        |

<sup>a</sup> $R_{p.i.m} = \sum_{hkl} [1/(N-1)]^{1/2} \sum_i |I_{hkl,i} - \langle I_{hkl} \rangle| / \sum_{hkl} \langle I_{hkl} \rangle$ . <sup>b</sup> $R_{factor} = \sum_{hkl} ||F_o| - |F_c|| / \sum_{hkl} |F_o|$  for all data except  $\approx 5\%$  which were used for  $R_{free}$  calculation. Values in parentheses are for the highest resolution-shell.
